# Supplementary material
Source: publisher figshare collection journal article supplement (https://rs.figshare.com/ndownloader/files/22625798)
Supplement: Supplementary file 1 [file 22625798]

## Sheet: data
focal	yearage	number	focalhours	rate
AH	0	61	56.9933	1.0703
AH	1	86	61.3781	1.4012
AH	2	8	15.5356	0.5149
AJ	2	0	0.1675	0
AK	0	3	5.3278	0.5631
AL	7	0	3.3361	0
AL	8	0	3.2675	0
AL	9	1	7.47	0.1339
AL	10	1	18.4703	0.0541
AL	11	1	22.8942	0.0437
AL	12	0	25.6522	0
AL	13	6	33.2183	0.1806
AL	14	2	24.1386	0.0829
AL	15	0	5.5083	0
AL	16	0	20.2769	0
AL	17	0	13.3456	0
AL	18	0	1.8844	0
AM	28	0	4.3506	0
AM	29	0	2.4533	0
AM	30	0	4.8728	0
AM	31	0	10.8158	0
AM	32	0	0.9903	0
AM	34	0	2.7936	0
AM	35	0	7.2236	0
AM	36	0	13.9969	0
AM	37	0	15.6686	0
AM	38	0	3.8428	0
AN	9	0	9.5025	0
AN	10	1	0.9975	1.0025
AO	2	0	6.5894	0
AO	3	8	9.0186	0.8871
AO	4	16	21.4383	0.7463
AO	5	11	22.5244	0.4884
AO	6	3	32.0614	0.0936
AO	7	3	33.1806	0.0904
AO	8	3	14.2939	0.2099
AO	9	0	9.1272	0
AQ	0	1	0.4989	2.0044
AR	17	0	0.3764	0
AR	18	0	4.6422	0
AR	19	0	0.3294	0
AS	8	0	0.7119	0
AS	9	0	1.8264	0
AS	10	0	0.6686	0
AV	5	0	1.5136	0
AV	6	3	6.085	0.493
AV	7	2	7.1731	0.2788
AY	7	0	0.5075	0
AY	8	0	2.1675	0
AY	9	0	0.6686	0
BA	8	0	0.7042	0
BA	9	0	0.3667	0
BA	10	0	1.8369	0
BA	11	0	0.3331	0
BA	12	0	0.6658	0
BB	9	5	12.6844	0.3942
BB	10	6	24.3469	0.2464
BB	11	0	25.3336	0
BB	12	0	0.8358	0
BD	5	1	11.7122	0.0854
BD	6	8	26.0286	0.3074
BD	7	7	25.2081	0.2777
BD	8	0	0.8297	0
BD	9	0	1.325	0
BD	11	0	0.1672	0
BD	12	0	0.3356	0
BE	11	0	3.8936	0
BE	15	0	3.3353	0
BE	16	0	1.3272	0
BE	17	0	24.7258	0
BE	18	0	14.0219	0
BE	19	0	14.4194	0
BE	20	1	16.7928	0.0595
BE	21	2	3.5375	0.5654
BE	22	0	5.5156	0
BH	1	0	0.0414	0
BI	5	3	13.6581	0.2196
BI	6	0	3.5103	0
BI	7	0	8.5194	0
BI	8	0	0.6683	0
BI	9	0	1.6247	0
BI	10	0	1.7022	0
BI	11	0	0.1672	0
BJ	4	2	14.0672	0.1422
BJ	5	2	22.7611	0.0879
BJ	6	4	17.6056	0.2272
BJ	7	0	3.9794	0
BJ	8	0	1.8247	0
BJ	9	0	0.3364	0
BJ	10	0	0.3328	0
BK	15	0	1.34	0
BK	16	0	1.3261	0
BK	17	0	8.8247	0
BK	18	1	5.7117	0.1751
BK	19	1	18.9861	0.0527
BK	20	0	4.6719	0
BK	21	0	2.0431	0
BK	22	0	0.3319	0
BK	23	0	0.3347	0
BK	24	0	3.0022	0
BK	25	0	5.7172	0
BK	26	0	0.5017	0
BL	9	0	2.6178	0
BL	10	0	6.3253	0
BL	11	0	8.2897	0
BL	12	0	4.8511	0
BL	13	0	6.0881	0
BL	14	0	6.8406	0
BM	6	0	1.8436	0
BM	7	3	4.1119	0.7296
BM	8	1	12.0703	0.0828
BM	9	0	0.2086	0
BO	2	0	0.17	0
BO	5	3	11.0478	0.2715
BO	6	2	22.6131	0.0884
BO	7	2	27.365	0.0731
BO	9	0	1.0433	0
BO	10	0	7.545	0
BO	11	0	6.6281	0
BO	12	0	1.8128	0
BV	5	0	0.2061	0
BV	6	3	6.3506	0.4724
BV	7	4	19.5944	0.2041
BV	8	7	22.0486	0.3175
BV	9	2	28.6969	0.0697
BV	10	3	43.1042	0.0696
BV	11	1	26.1428	0.0383
BV	12	0	14.7122	0
BV	13	1	21.7586	0.046
BV	14	0	4.505	0
BW	4	0	3.6639	0
BW	5	0	1.5392	0
BW	6	0	0.6678	0
BW	7	0	1.3397	0
BW	8	0	6.0464	0
BW	9	0	3.0047	0
BX	10	0	12.5636	0
BX	11	0	4.4567	0
CA	1	28	34.7656	0.8054
CA	2	29	60.0792	0.4827
CA	3	32	94.1864	0.3398
CA	4	18	60.2442	0.2988
CA	5	7	56.42	0.1241
CA	6	5	29.8992	0.1672
CA	7	7	38.2044	0.1832
CA	8	3	33.0992	0.0906
CA	9	1	31.7961	0.0315
CA	10	0	16.0308	0
CA	11	0	9.1631	0
CA	12	0	4.0033	0
CA	13	0	0.8283	0
CA	14	0	0.8369	0
CA	15	0	3.6303	0
CA	16	0	2.2542	0
CA	17	0	2.9967	0
CA	18	0	19.2317	0
CB	8	2	3.0053	0.6655
CB	9	0	0.9547	0
CB	10	0	4.3136	0
CB	11	3	10.1408	0.2958
CB	12	0	1.1619	0
CB	14	0	0.2075	0
CB	15	0	6.1214	0
CB	16	0	3.3081	0
CB	17	0	9.8719	0
CB	18	0	3.8314	0
CB	19	0	0.1678	0
CD	0	33	34.5	0.9565
CD	1	33	67.1322	0.4916
CD	2	17	56.7931	0.2993
CD	3	20	55.9575	0.3574
CD	4	2	23.3222	0.0858
CD	5	8	40.7614	0.1963
CD	6	6	45.2697	0.1325
CD	7	3	14.2761	0.2101
CD	8	1	18.9317	0.0528
CD	9	2	19.0333	0.1051
CD	10	1	16.3422	0.0612
CD	11	0	7.9028	0
CD	12	0	15.3236	0
CD	13	0	3.6806	0
CD	14	0	5.0061	0
CD	15	0	7.0892	0
CD	16	0	4.6431	0
CE	10	0	0.9583	0
CE	11	0	1.9969	0
CE	12	0	0.1667	0
CE	15	0	0.9217	0
CE	16	0	10.5806	0
CE	17	0	15.0608	0
CE	18	0	9.5497	0
CE	19	0	21.5297	0
CE	20	0	5.6336	0
CE	21	0	6.3278	0
CE	22	0	1.0039	0
CE	23	0	4.4114	0
CE	24	0	12.0114	0
CG	12	0	3.1464	0
CG	16	0	4.1169	0
CG	17	0	16.9089	0
CG	18	0	4.8425	0
CG	19	0	0.6589	0
CH	0	48	49.3925	0.9718
CH	1	21	67.8272	0.3096
CH	2	34	59.3825	0.5726
CH	3	21	63.5158	0.3306
CH	4	6	34.8111	0.1724
CH	5	8	38.5194	0.2077
CH	6	3	47.8919	0.0626
CH	7	0	16.0164	0
CH	8	2	11.7161	0.1707
CH	9	2	13.3869	0.1494
CH	10	2	14.4511	0.1384
CH	11	0	5.4944	0
CH	12	0	6.285	0
CI	4	1	4.0069	0.2496
CK	5	0	10.2661	0
CK	6	1	26.91	0.0372
CK	7	0	9.6564	0
CL	25	0	5.1711	0
CL	26	0	2.9214	0
CL	27	0	8.8217	0
CL	28	0	12.1961	0
CL	29	0	1.3792	0
CM	9	0	3.4733	0
CM	10	1	1.3228	0.756
CM	11	0	5.6544	0
CM	12	0	11.5842	0
CM	13	0	1.1183	0
CM	15	0	0.6294	0
CM	16	0	6.385	0
CM	17	1	13.5525	0.0738
CM	18	0	15.3567	0
CM	19	0	4.0536	0
CM	21	0	8.2681	0
CM	22	0	3.8772	0
CM	23	0	4.645	0
CM	24	0	6.5736	0
CM	25	0	1.3383	0
CN	22	0	5.4997	0
CN	23	0	13.8097	0
CN	24	0	5.7953	0
CN	25	1	12.7269	0.0786
CN	26	0	2.6783	0
CN	27	0	1.8331	0
CN	28	0	0.1717	0
CN	29	0	12.9011	0
CP	2	0	0.1683	0
CP	3	2	3.6561	0.547
CP	4	1	2.7417	0.3647
CR	0	2	7.13	0.2805
CS	1	26	38.8389	0.6694
CS	2	22	48.8017	0.4508
CS	3	24	70.8858	0.3386
CS	4	27	56.0817	0.4814
CS	5	12	55.9797	0.2144
CS	6	8	33.9669	0.2355
CS	7	4	49.9117	0.0801
CS	8	6	44.6075	0.1345
CS	9	1	9.64	0.1037
CS	10	1	12.8875	0.0776
CS	11	0	1.665	0
CT	5	0	0.1764	0
CT	6	0	7.0367	0
CT	7	0	19.9319	0
CT	8	0	14.1586	0
CT	9	0	0.2086	0
CT	10	0	0.2442	0
CT	11	0	4.7792	0
CT	12	0	14.4594	0
CT	13	0	19.2136	0
CT	14	0	4.1756	0
CT	16	0	7.9972	0
CT	17	0	4.0808	0
CT	18	0	3.7067	0
CT	19	0	6.5025	0
CT	20	0	1.3392	0
CU	16	0	0.8328	0
CU	17	0	4.5131	0
CU	18	0	1.3753	0
CU	21	0	7.1331	0
CU	22	0	8.6617	0
CU	23	1	9.5422	0.1048
CX	6	0	0.4992	0
CX	7	2	3.5428	0.5645
CX	8	1	7.0133	0.1426
CX	9	0	1.7131	0
CZ	4	0	3.6783	0
DA	0	35	32.4939	1.0771
DA	1	37	61.2297	0.6043
DA	2	43	91.2233	0.4714
DA	3	17	58.7283	0.2895
DA	4	20	57.6656	0.3468
DA	5	8	32.3306	0.2474
DA	6	3	37.3983	0.0802
DA	7	2	37.5231	0.0533
DA	8	1	9.8697	0.1013
DA	9	0	9.0181	0
DA	10	0	9.2175	0
DA	11	0	15.6236	0
DA	12	0	15.5503	0
DA	13	0	11.3931	0
DA	14	0	5.5067	0
DA	15	0	3.5022	0
DA	16	0	8.6022	0
DA	17	0	0.165	0
DD	16	0	7.6847	0
DD	17	1	10.5153	0.0951
DD	18	0	0.3333	0
DD	21	1	1.1667	0.8571
DD	22	0	6.4386	0
DD	23	0	10.5106	0
DD	24	0	7.0136	0
DD	25	0	9.7392	0
DG	5	2	10.8978	0.1835
DG	6	0	5.8669	0
DG	7	0	7.2125	0
DG	8	0	3.0117	0
DG	9	0	0.8761	0
DG	10	0	1.2089	0
DH	21	0	0.1656	0
DH	22	0	1.8369	0
DH	23	0	4.9539	0
DH	24	0	0.335	0
DH	27	0	5.2478	0
DI	15	0	0.2528	0
DI	16	0	12.1647	0
DI	17	0	8.2242	0
DI	18	0	16.3558	0
DI	19	0	6.4072	0
DJ	14	0	0.3319	0
DK	0	145	62.4531	2.3217
DK	1	113	58.1606	1.9429
DK	2	64	64.8131	0.9875
DK	3	34	30.2639	1.1235
DK	4	17	28.5806	0.5948
DK	5	12	33.5564	0.3576
DK	6	11	52.6694	0.2088
DK	7	9	30.8206	0.292
DL	6	0	2.2339	0
DL	7	0	0.7128	0
DL	8	1	4.1703	0.2398
DL	9	1	6.7592	0.1479
DL	10	0	1.3361	0
DM	0	0	0.1661	0
DN	17	0	4.6611	0
DN	18	0	10.2147	0
DN	19	0	6.5447	0
DN	20	0	10.1958	0
DN	21	1	1.1656	0.8579
DN	23	0	0.7922	0
DN	24	0	5.0789	0
DN	25	1	14.8639	0.0673
DN	26	0	24.7964	0
DN	27	0	3.2917	0
DP	5	1	2.6617	0.3757
DP	6	1	4.7192	0.2119
DQ	4	0	1.9961	0
DQ	5	5	3.7264	1.3418
DQ	6	0	10.5128	0
DQ	7	0	6.5139	0
DQ	8	0	2.6836	0
DQ	9	0	8.0867	0
DQ	10	0	0.665	0
DR	0	75	58.315	1.2861
DR	1	35	60.8211	0.5755
DR	2	26	62.1772	0.4182
DR	3	7	23.1353	0.3026
DR	4	10	37.4164	0.2673
DR	5	7	45.6892	0.1532
DR	6	3	24.3978	0.123
DR	7	1	15.6994	0.0637
DR	8	1	8.3611	0.1196
DS	4	9	38.2147	0.2355
DS	5	17	26.7631	0.6352
DT	0	72	59.6214	1.2076
DT	1	67	45.0419	1.4875
DT	2	28	28.2328	0.9918
DT	3	26	33.6022	0.7738
DT	4	16	42.1778	0.3793
DT	5	4	14.4706	0.2764
DT	6	2	10.1931	0.1962
DT	7	4	14.7678	0.2709
DT	8	1	6.3622	0.1572
DT	9	4	15.8933	0.2517
DT	10	2	9.355	0.2138
DT	11	0	2.5375	0
DT	12	1	6.3692	0.157
DT	13	0	3.8631	0
DT	14	0	15.8322	0
DU	6	0	0.1694	0
DU	7	0	5.1861	0
DU	9	0	0.1664	0
DU	11	0	0.0822	0
DU	12	0	2.6675	0
DU	13	0	18.4506	0
DU	14	0	17.7983	0
DU	15	0	21.1672	0
DU	16	0	15.1789	0
DU	17	0	5.1881	0
DU	18	1	3.1747	0.315
DV	2	0	0.3353	0
DW	0	67	41.8147	1.6023
DW	1	31	46.9608	0.6601
DW	2	27	73.7444	0.3661
DW	3	19	49.8469	0.3812
DW	4	16	57.7364	0.2771
DW	5	6	24.7214	0.2427
DW	6	3	30.3825	0.0987
DW	7	4	35.0517	0.1141
DW	8	3	33.3528	0.0899
DW	9	0	9.3797	0
DW	10	0	14.3842	0
DW	11	0	9.7967	0
DW	12	0	4.6286	0
DW	13	0	1.0408	0
DW	15	0	9.0022	0
DW	16	0	3.5883	0
DW	17	0	16.1114	0
DY	0	0	0.1672	0
DY	5	0	5.3097	0
DY	6	12	26.9922	0.4446
DY	7	2	12.5064	0.1599
DY	8	4	14.6078	0.2738
DY	9	0	0.995	0
DZ	5	1	11.9842	0.0834
DZ	6	0	3.2119	0
DZ	7	3	11.9394	0.2513
DZ	8	0	5.0458	0
DZ	9	1	5.0058	0.1998
DZ	10	0	6.9072	0
DZ	11	0	0.1633	0
EB	3	0	3.1764	0
EB	4	5	5.7308	0.8725
EB	5	3	6.8386	0.4387
EB	6	1	2.6569	0.3764
EB	7	8	9.2469	0.8652
EB	8	1	6.4778	0.1544
EC	7	0	5.5017	0
EC	8	0	2.0325	0
EE	11	0	1.3381	0
EE	12	0	0.5053	0
EE	13	0	0.1656	0
EF	0	0	0.3328	0
EG	0	0	6.7664	0
EH	2	3	6.0919	0.4925
EH	3	1	1.3339	0.7497
EI	0	90	63.9689	1.4069
EI	1	18	42.0458	0.4281
EI	2	11	35.2342	0.3122
EI	3	8	40.8658	0.1958
EI	4	10	44.6053	0.2242
EI	5	1	12.9967	0.0769
EI	6	2	12.05	0.166
EI	7	0	13.7247	0
EI	8	0	11.2161	0
EI	9	0	4.5711	0
EI	10	0	13.5481	0
EI	11	0	3.8764	0
EI	12	0	5.1642	0
EI	13	0	8.0164	0
EI	14	0	19.2256	0
EN	0	7	27.2967	0.2564
EO	6	0	0.1703	0
EO	7	0	2.6008	0
EO	9	0	0.6658	0
EO	12	0	0.1661	0
EO	13	0	14.8303	0
EO	14	0	33.8633	0
EO	15	0	13.58	0
EQ	2	0	0.6769	0
EQ	3	0	1.1731	0
EQ	6	1	4.9683	0.2013
EQ	7	0	3.9033	0
ER	4	0	0.1678	0
ER	7	0	3.0506	0
ER	8	4	4.6661	0.8572
ER	9	0	0.6669	0
EU	0	0	3.5206	0
EV	0	0	0.0844	0
EV	6	3	9.1783	0.3269
EV	7	0	5.8633	0
EV	8	0	1.6556	0
EZ	8	0	1.4975	0
EZ	9	0	1.1675	0
EZ	10	1	9.1633	0.1091
EZ	11	2	27.7783	0.072
EZ	12	0	16.455	0
EZ	13	0	10.2036	0
EZ	14	0	15.1644	0
EZ	15	0	11.1003	0
EZ	16	0	1.1778	0
FA	3	0	0.1653	0
FA	8	0	2.3267	0
FA	9	1	8.4256	0.1187
FA	10	0	4.0058	0
FA	11	0	1.5078	0
FA	15	0	2.5669	0
FA	16	0	1.5389	0
FA	17	0	0.665	0
FH	0	0	3.3514	0
FO	0	3	5.6625	0.5298
FO	1	3	0.8319	3.6062
FQ	0	0	1.6622	0
FR	0	62	40.2069	1.542
FS	9	0	2.3322	0
FS	10	0	0.3342	0
FS	11	0	0.5011	0
FS	12	0	6.5531	0
FS	13	0	3.8583	0
FS	14	0	1.4992	0
FT	0	0	1.5514	0
FU	7	0	1.9947	0
FU	8	2	17.9661	0.1113
FU	9	2	15.2953	0.1308
FU	10	1	16.1431	0.0619
FU	11	0	3.1744	0
FU	12	2	16.7303	0.1195
FU	13	0	2.6589	0
FY	5	0	6.9886	0
FY	6	8	26.0183	0.3075
FY	7	2	21.5578	0.0928
FY	10	0	5.005	0
FY	11	1	12.1511	0.0823
FY	12	0	6.6792	0
FY	13	0	5.6883	0
FY	14	1	12.7583	0.0784
FY	16	0	0.5022	0
FY	17	0	2.1694	0
FY	18	0	9.0306	0
FY	19	0	0.8025	0
FZ	23	0	6.3339	0
FZ	24	4	11.6553	0.3432
FZ	25	0	6.3392	0
FZ	26	0	10.8836	0
FZ	27	0	1.495	0
GA	2	0	0.1656	0
GB	8	2	10.5028	0.1904
GB	9	1	14.7378	0.0679
GB	10	0	7.4461	0
GB	11	0	3.3444	0
GB	12	0	1.3344	0
GB	13	0	0.3339	0
GB	14	0	0.3325	0
GB	15	0	2.5039	0
GC	0	1	0.6661	1.5013
GC	1	0	0.4997	0
GD	0	0	1.9797	0
GE	9	0	0.8308	0
GE	10	0	0.8347	0
GE	11	0	16.5181	0
GE	12	0	5.4067	0
GE	13	0	13.3958	0
GE	14	0	11.1683	0
GE	15	0	0.3358	0
GE	16	0	3.8822	0
GF	7	1	2.6181	0.382
GF	8	0	1.3375	0
GF	9	0	6.8339	0
GF	10	2	20.1772	0.0991
GF	11	0	23.8994	0
GF	12	0	13.8856	0
GI	6	0	2.4158	0
GI	7	1	9.9706	0.1003
GI	8	0	0.6692	0
GJ	8	0	2.2694	0
GJ	9	0	5.3867	0
GJ	10	1	2.3325	0.4287
GJ	12	0	2.9228	0
GJ	13	0	5.8872	0
GJ	14	0	0.5003	0
GL	9	0	4.6714	0
GL	10	0	36.8817	0
GL	11	1	9.0189	0.1109
GL	12	0	1.3358	0
GL	13	0	0.1722	0
GL	14	0	3.8911	0
GM	8	0	0.6664	0
GM	9	3	12.2042	0.2458
GM	10	4	26.3572	0.1518
GM	11	1	26.7283	0.0374
GM	12	1	30.8506	0.0324
GM	13	2	38.3153	0.0522
GM	14	3	109.726	0.0273
GM	15	1	3.8383	0.2605
GP	0	0	0.1656	0
GR	7	0	0.1683	0
GR	8	0	6.4167	0
GR	9	0	4.0536	0
GS	6	4	11.6772	0.3425
GS	7	2	3.3567	0.5958
GS	8	0	10.5072	0
GS	9	0	8.6564	0
GS	10	0	11.1617	0
GS	11	0	7.8531	0
GS	12	0	0.5	0
GT	4	1	0.2931	3.4118
GT	5	14	37.0483	0.3779
GT	6	4	11.9453	0.3349
GT	7	7	17.4222	0.4018
GT	8	3	13.9861	0.2145
GT	9	0	3.38	0
GT	10	1	12.5144	0.0799
GU	7	2	10.6494	0.1878
GU	8	0	22.3117	0
GU	9	0	7.6856	0
GU	10	0	3.6617	0
GU	11	0	1.6989	0
GU	12	0	0.1672	0
GU	13	0	0.6753	0
GU	14	0	1.17	0
GU	15	0	4.5986	0
GU	16	0	0.1683	0
GY	6	0	2.6731	0
GY	7	0	1.9969	0
HA	4	0	3.4997	0
HA	5	5	5.9675	0.8379
HA	6	14	26.6244	0.5258
HA	7	1	25.3244	0.0395
HA	8	3	25.8206	0.1162
HA	9	13	37.2706	0.3488
HA	10	3	83.8728	0.0358
HA	11	3	43.2414	0.0694
HA	12	0	1.0022	0
HB	4	1	3.6797	0.2718
HB	5	1	31.6611	0.0316
HB	6	0	0.1683	0
HB	7	0	4.8722	0
HC	1	0	0.1697	0
HC	4	7	26.8472	0.2607
HC	5	16	40.0131	0.3999
HE	10	0	2.9917	0
HE	11	0	13.5778	0
HE	12	0	0.6658	0
HE	13	0	2.9575	0
HE	15	0	2.1617	0
HE	16	0	5.9867	0
HE	17	1	16.4875	0.0607
HE	18	0	6.3753	0
HE	19	1	20.7831	0.0481
HE	20	1	15.1703	0.0659
HE	21	1	6.2314	0.1605
HE	22	0	3.505	0
HE	23	4	13.3494	0.2996
HE	24	0	4.3878	0
HE	25	0	4.1872	0
HE	26	0	3.6842	0
HF	1	3	6.1617	0.4869
HF	2	0	0.8433	0
HH	17	0	2.1411	0
HJ	0	4	4.7719	0.8382
HL	5	0	0.6697	0
HL	6	1	2.69	0.3717
HL	7	2	6.4136	0.3118
HL	8	0	0.4983	0
HN	6	1	2.8319	0.3531
HN	7	0	4.3394	0
HO	10	1	6.6717	0.1499
HO	11	0	0.1667	0
HP	0	3	2.5433	1.1796
HP	1	5	2.0436	2.4467
HU	0	5	0.3733	13.3941
HV	1	3	3.8211	0.7851
HV	2	2	1.0008	1.9984
HY	0	0	1.6742	0
HZ	0	0	0.1667	0
IE	0	5	11.7042	0.4272
IE	2	0	0.6672	0
IE	3	0	1.0017	0
IE	5	0	2.1586	0
IE	6	1	3.0181	0.3313
IE	7	1	3.5475	0.2819
IH	0	0	0.1667	0
II	0	7	7.0564	0.992
II	1	0	1.2128	0
IL	5	0	3.0442	0
IL	6	1	2.8367	0.3525
IN	4	0	0.8311	0
IN	5	0	2.7111	0
IN	6	0	1.0031	0
IO	7	1	4.2053	0.2378
IO	8	0	3.5158	0
IR	0	0	1.2133	0
IU	2	0	3.8944	0
IV	0	3	1.6711	1.7952
IX	0	7	1.68	4.1667
IY	0	0	0.1667	0
IZ	5	1	1.0025	0.9975
IZ	6	0	3.5811	0
IZ	7	1	4.9328	0.2027
IZ	8	0	0.1672	0
JA	0	47	31.2603	1.5035
JA	1	53	60.5144	0.8758
JA	2	23	62.0008	0.371
JA	3	13	59.0281	0.2202
JA	4	13	60.805	0.2138
JA	5	3	32.2508	0.093
JA	6	8	41.6761	0.192
JA	7	2	3.3814	0.5915
JC	10	0	6.5575	0
JC	11	0	3.5844	0
JC	12	0	1.165	0
JD	0	0	0.1672	0
JF	4	0	0.8431	0
JG	0	1	2.8247	0.354
JI	0	0	0.9958	0
JJ	13	0	3.0106	0
JJ	14	0	0.4986	0
JJ	15	0	0.1664	0
JK	12	0	6.1594	0
JK	13	0	0.1664	0
JM	0	1	2.7108	0.3689
JM	1	2	0.8319	2.4041
JN	10	1	1.1239	0.8898
JO	4	0	0.3342	0
JO	8	3	10.9783	0.2733
JO	9	2	40.9122	0.0489
JO	10	2	26.4264	0.0757
JO	11	5	18.1386	0.2757
JO	12	0	10.0111	0
JO	13	0	7.4794	0
JP	2	0	0.1672	0
JP	4	0	0.1669	0
JP	6	0	1.8331	0
JP	7	0	2.0056	0
JU	7	1	8.6956	0.115
JU	8	0	7.3156	0
JU	9	0	3.3644	0
JY	4	1	5.8197	0.1718
JY	5	0	33.3733	0
JY	6	0	8.6947	0
JY	7	0	1.5028	0
KD	4	0	10.1844	0
KE	7	0	1.8203	0
KE	8	0	2.0006	0
KE	9	0	0.1669	0
KF	7	0	1.2089	0
KF	8	0	1.0008	0
KF	9	0	0.1675	0
KG	6	1	2.8389	0.3522
KG	7	1	1.665	0.6006
KG	8	0	0.1869	0
KG	9	0	0.3372	0
KG	10	0	1.6692	0
KG	11	0	1.6133	0
KH	4	16	14.1722	1.129
KH	5	0	3.0081	0
KH	6	3	8.3425	0.3596
KH	7	0	2.315	0
KH	8	0	1.5	0
KH	9	0	1.8333	0
KH	10	0	0.1672	0
KJ	5	0	3.8836	0
KJ	6	0	3.3781	0
KJ	7	0	10.8572	0
KJ	8	1	7.2828	0.1373
KJ	9	0	2.9036	0
KJ	10	0	7.345	0
KJ	11	0	0.6706	0
KK	27	0	0.1669	0
KK	31	0	3.7894	0
KK	32	0	9.2383	0
KK	33	0	4.8506	0
KN	0	0	0.1222	0
KN	1	0	0.1647	0
KQ	5	0	1.0019	0
KQ	6	0	0.1669	0
KR	0	2	3.9144	0.5109
KT	0	86	64.0128	1.3435
KT	1	93	56.2722	1.6527
KT	2	26	39.9975	0.65
KT	3	7	21.0572	0.3324
KT	4	14	30.9625	0.4522
KT	5	15	35.515	0.4224
KT	6	0	5.845	0
KT	7	2	5.8108	0.3442
KT	8	0	12.4853	0
KT	9	0	0.8375	0
KT	10	0	2.0022	0
KT	11	0	0.5042	0
KT	12	0	3.9286	0
KT	13	0	5.7569	0
KT	14	0	17.3936	0
KT	15	0	9.7419	0
KY	0	78	77.0231	1.0127
KY	1	50	61.1117	0.8182
KY	2	23	35.5911	0.6462
KY	3	7	26.7078	0.2621
KY	4	13	38.4767	0.3379
KY	5	6	31.2306	0.1921
KY	6	3	16.1328	0.186
KY	7	1	6.6847	0.1496
KY	8	3	23.1464	0.1296
KY	9	1	6.6542	0.1503
KY	10	0	3.6525	0
KY	11	2	6.1889	0.3232
KY	12	0	2.5142	0
KY	13	0	9.9753	0
KY	14	0	20.6256	0
LA	6	0	0.1639	0
LB	4	4	3.1722	1.261
LB	5	1	1.5419	0.6486
LB	7	0	0.3372	0
LD	2	0	0.5042	0
LD	3	0	1.4725	0
LD	6	1	5.4256	0.1843
LD	7	0	4.1925	0
LG	6	0	0.1672	0
LH	1	0	1.0006	0
LH	2	6	5.5347	1.0841
LH	3	2	2.0025	0.9988
LH	4	0	2.7064	0
LH	5	0	0.3339	0
LH	6	0	0.3344	0
LH	7	0	0.3325	0
LI	7	1	1.4947	0.669
LI	8	0	1.1594	0
LL	22	0	4.9978	0
LL	23	0	31.4981	0
LL	24	1	9.3958	0.1064
LL	25	0	1.3381	0
LL	27	0	8.695	0
LL	28	0	0.5014	0
LN	0	0	0.2047	0
LN	7	0	4.3697	0
LN	8	0	1.3892	0
LN	9	0	1.3442	0
LN	10	0	3.8989	0
LN	11	0	4.3417	0
LN	12	0	4.0117	0
LO	4	2	1.5039	1.3299
LO	6	0	0.3289	0
LO	7	0	1.0622	0
LO	8	0	2.0456	0
LO	9	0	0.3333	0
LR	9	0	0.1669	0
LR	12	0	0.7119	0
LR	13	0	12.7406	0
LR	14	0	3.5003	0
LR	15	0	3.8267	0
LS	0	1	1.3722	0.7288
LT	0	69	65.9625	1.046
LT	1	75	60.3356	1.243
LT	2	30	32.8725	0.9126
LT	3	27	38.7281	0.6972
LT	4	17	42.6794	0.3983
LT	5	8	31.4314	0.2545
LT	6	1	4.8719	0.2053
LT	7	4	19.9761	0.2002
LT	8	4	14.6964	0.2722
LT	9	1	6.7361	0.1485
LT	10	0	2.1719	0
LU	5	0	0.6678	0
LU	6	1	7.2531	0.1379
LU	7	0	4.3472	0
LU	8	1	4.3389	0.2305
LU	13	0	0.9964	0
LU	14	0	1.5047	0
LU	15	0	0.1661	0
LV	0	9	3.34	2.6946
LW	1	0	0.175	0
LW	2	0	0.3292	0
LX	4	0	0.3336	0
LX	5	1	4.6342	0.2158
LX	6	6	19.1164	0.3139
LX	7	3	22.2956	0.1346
LX	8	0	30.6211	0
LX	9	2	30.1867	0.0663
LX	10	4	24.3756	0.1641
LX	11	0	5.7167	0
LX	12	0	5.8403	0
LZ	5	0	0.1667	0
MA	25	0	0.1672	0
MA	30	0	2.5158	0
MA	31	0	15.0064	0
MA	32	1	10.7286	0.0932
MA	33	0	8.3356	0
MA	34	0	2.5056	0
MB	0	70	41.4858	1.6873
MB	1	64	47.51	1.3471
MB	2	52	67.9339	0.7654
MB	3	35	54.7461	0.6393
MB	4	19	62.3531	0.3047
MB	5	7	26.9942	0.2593
MB	6	3	29.7811	0.1007
MB	7	7	32.8069	0.2134
MB	8	0	16.2094	0
MB	9	0	5.3581	0
MB	10	6	14.8647	0.4036
MB	11	0	11.8697	0
MB	12	0	6.4231	0
MB	13	1	12.2603	0.0816
MB	14	0	2.5494	0
MB	15	0	5.9853	0
MB	16	0	6.1242	0
MB	17	1	15.8967	0.0629
MC	6	0	0.1683	0
MD	0	0	0.4953	0
ME	5	3	10.8356	0.2769
ME	6	4	25.8067	0.155
ME	7	3	23.5906	0.1272
ME	9	0	2.6611	0
ME	10	0	7.4394	0
ME	11	0	5.9417	0
ME	12	2	11.9783	0.167
ME	14	0	1.1686	0
ME	15	0	1.7983	0
ME	16	0	1.845	0
ME	17	1	4.285	0.2334
ME	18	0	6.7281	0
ME	19	0	0.3431	0
MF	10	0	4.3506	0
MF	11	0	1.0975	0
MF	12	0	6.3536	0
MF	13	0	9.8828	0
MF	14	5	1.3228	3.7799
MF	16	0	0.415	0
MF	17	0	7.2153	0
MF	18	0	2.9128	0
MF	19	0	10.4508	0
MF	20	0	3.8292	0
MF	24	0	6.295	0
MF	25	0	4.0783	0
MF	26	0	1.0011	0
MH	5	4	12.1211	0.33
MH	6	3	24.9683	0.1202
MH	7	4	23.0478	0.1736
MH	8	0	0.1747	0
MH	9	0	1.3842	0
MH	10	0	15.6614	0
MH	11	1	5.0364	0.1986
MH	12	1	9.1894	0.1088
MH	13	1	31.07	0.0322
MH	14	0	0.1678	0
MH	15	0	4.6756	0
MH	16	0	0.8328	0
MH	17	0	4.9567	0
MH	18	0	4.3942	0
MH	19	0	0.1667	0
MI	6	0	0.8325	0
MI	7	0	0.34	0
MI	11	0	1.455	0
MI	12	0	7.3825	0
MI	13	0	6.1953	0
MI	14	1	11.475	0.0871
MI	15	0	2.8847	0
MI	16	0	1.5258	0
MI	17	0	1.2589	0
MI	18	0	1.2475	0
MI	19	0	3.8731	0
MI	20	0	3.7239	0
MI	21	1	3.3872	0.2952
MJ	6	0	4.5839	0
MJ	7	1	31.8569	0.0314
MJ	8	0	8.7044	0
MJ	9	0	4.6631	0
MJ	11	0	7.3494	0
MJ	12	0	1.3789	0
MJ	13	0	2.0075	0
MJ	14	0	4.0031	0
MJ	15	0	0.1675	0
MM	12	0	4.3278	0
MM	13	0	12.7719	0
MM	14	1	1.8447	0.5421
MM	18	0	0.1228	0
MN	0	20	12.7403	1.5698
MN	1	52	66.1072	0.7866
MN	2	26	74.4533	0.3492
MN	3	33	76.3094	0.4324
MN	4	9	28.12	0.3201
MO	10	0	3.0981	0
MO	11	0	17.35	0
MO	12	1	6.1686	0.1621
MO	13	0	24.0225	0
MO	14	1	24.8867	0.0402
MO	15	0	32.0703	0
MO	16	2	35.8464	0.0558
MO	17	1	31.9697	0.0313
MO	18	0	15.8644	0
MO	19	0	16.2328	0
MO	20	2	16.5822	0.1206
MO	21	0	3.5569	0
MO	22	0	18.0208	0
MO	23	0	3.0061	0
MP	1	0	2.8208	0
MP	2	0	2.8275	0
MP	3	2	2.1717	0.9209
MP	4	1	1.5503	0.645
MP	5	0	0.1856	0
MP	7	0	0.1675	0
MR	2	0	0.2492	0
MR	6	0	0.1672	0
MR	7	2	5.1892	0.3854
MR	8	3	11.7878	0.2545
MR	10	0	0.3361	0
MR	11	0	3.0186	0
MR	12	0	7.5997	0
MR	13	0	0.5	0
MS	25	0	11.3847	0
MS	26	0	20.4575	0
MS	27	0	8.0011	0
MS	28	0	4.0014	0
MS	29	0	2.1864	0
MS	30	0	0.3275	0
MS	31	0	0.6683	0
MS	32	0	4.5794	0
MS	33	0	4.9658	0
MS	34	0	0.8792	0
MT	0	0	0.3317	0
MT	5	1	8.4617	0.1182
MT	6	2	11.605	0.1723
MT	7	2	7.1872	0.2783
MT	8	3	36.39	0.0824
MT	9	0	0.335	0
MT	11	0	0.6642	0
MT	12	0	2.6733	0
MT	13	0	6.2458	0
MT	14	0	0.3369	0
MU	5	5	11.8811	0.4208
MU	6	3	3.6767	0.8159
MU	7	2	10.665	0.1875
MU	8	0	6.1742	0
MU	9	1	4.5858	0.2181
MU	10	1	14.1572	0.0706
MW	0	61	54.2428	1.1246
MW	1	68	62.7139	1.0843
MW	2	24	57.9736	0.414
MW	3	20	36.635	0.5459
MW	4	7	21.7833	0.3213
MW	5	4	32.4153	0.1234
MW	6	3	28.4869	0.1053
MW	7	0	3.6236	0
MW	8	0	7.1639	0
MW	9	0	11.8511	0
MW	10	0	0.6661	0
MW	11	1	2.0828	0.4801
MW	12	0	0.3369	0
MW	13	0	3.2853	0
MW	14	1	6.2661	0.1596
MW	15	1	11.305	0.0885
MW	16	0	5.9758	0
MX	5	6	9.0008	0.6666
MX	6	2	5.7075	0.3504
MX	7	0	4.5217	0
MX	8	1	10.9439	0.0914
MX	9	0	3.8775	0
MX	10	0	3.5233	0
MX	11	0	4.0125	0
MZ	0	98	65.3519	1.4996
MZ	1	48	37.7553	1.2713
MZ	2	21	28.2942	0.7422
MZ	3	20	38.3881	0.521
MZ	4	14	28.2992	0.4947
MZ	5	5	17.5436	0.285
MZ	6	3	12.8419	0.2336
NA	5	0	0.1653	0
NA	6	0	0.1664	0
NA	7	0	4.3056	0
NA	8	0	4.16	0
NA	9	0	2.3731	0
NA	10	0	2.7158	0
NA	11	0	1.0503	0
NB	0	77	55.1922	1.3951
NB	1	47	81.8906	0.5739
NB	2	44	59.0972	0.7445
NE	4	0	3.8403	0
NE	5	1	4.5956	0.2176
NE	6	0	9.4347	0
NE	8	0	1.0422	0
NE	9	0	6.3222	0
NE	10	0	3.6658	0
NF	0	1	1.1739	0.8519
NH	5	4	7.7197	0.5182
NH	6	0	2.1692	0
NH	7	0	1.8358	0
NH	8	0	0.8364	0
NH	9	0	0.1656	0
NJ	0	1	2.1864	0.4574
NL	5	0	3.5514	0
NL	6	0	2.3556	0
NM	11	0	0.3331	0
NM	12	0	0.3758	0
NM	13	0	6.8058	0
NM	14	0	0.2508	0
NM	17	0	2.0028	0
NM	18	0	15.9956	0
NM	19	0	51.6081	0
NM	20	3	25.7675	0.1164
NM	21	2	22.7992	0.0877
NM	22	0	8.6633	0
NM	23	0	0.6664	0
NM	24	0	0.4214	0
NN	16	2	8.7222	0.2293
NO	27	0	3.0567	0
NO	28	0	0.1667	0
NP	12	0	1.1614	0
NP	13	1	28.7067	0.0348
NP	14	0	8.9975	0
NP	15	0	11.1414	0
NP	16	0	14.4814	0
NP	17	0	17.1558	0
NP	18	1	19.4556	0.0514
NP	19	0	19.8828	0
NP	20	0	13.6694	0
NP	21	0	6.1706	0
NP	22	0	3.5369	0
NP	23	0	13.4742	0
NP	24	0	14.1464	0
NP	25	0	17.7292	0
NP	26	1	4.0764	0.2453
NQ	0	6	1.9947	3.008
NR	5	0	1.1886	0
NR	6	0	1.0028	0
NR	7	0	0.1669	0
NS	0	3	3.1717	0.9459
NT	2	0	2.1758	0
NT	5	0	0.1683	0
NU	5	0	0.1667	0
NU	7	0	0.3744	0
NU	14	0	0.1356	0
NW	0	0	0.4992	0
NZ	7	0	0.8336	0
NZ	8	0	9.7994	0
NZ	9	0	10.8072	0
OB	0	1	10.8156	0.0925
OC	12	0	1.2114	0
OC	13	0	1.1292	0
OC	14	0	9.1311	0
OC	15	0	8.8728	0
OC	16	2	18.7939	0.1064
OC	17	0	4.0022	0
OC	18	0	2.3361	0
OC	19	0	0.5169	0
OC	20	0	0.3333	0
OC	21	0	3.255	0
OC	22	0	5.0944	0
OC	23	0	0.1681	0
OD	7	0	0.1678	0
OD	8	0	8.0033	0
OD	9	6	19.2844	0.3111
OD	10	3	22.9	0.131
OD	11	3	35.07	0.0855
OD	12	4	47.2158	0.0847
OD	13	5	24.0917	0.2075
OD	14	0	19.9681	0
OD	15	1	29.6369	0.0337
OD	16	0	19.865	0
OD	17	0	11.4458	0
OD	18	0	1.9208	0
OF	0	0	2.34	0
OJ	8	0	5.2978	0
OJ	9	0	3.0428	0
ON	4	3	11.63	0.258
ON	6	0	0.3331	0
ON	7	0	1.1689	0
ON	8	0	7.4153	0
ON	9	0	0.6642	0
OP	10	0	6.7025	0
OP	16	0	10.6769	0
OP	17	0	8.7433	0
OP	18	1	9.1636	0.1091
OP	19	0	3.3356	0
OP	20	0	11.7817	0
OP	22	0	0.6975	0
OP	23	0	5.4533	0
OP	24	0	6.3853	0
OP	25	0	0.3317	0
OQ	0	4	1.8789	2.1289
OT	10	0	1.2158	0
OT	11	0	5.3264	0
OT	12	0	1.6775	0
OV	4	0	0.3339	0
OV	5	0	2.4989	0
OV	6	0	1.1692	0
OW	0	79	66.4478	1.1889
OW	1	73	61.7208	1.1827
OW	2	29	31.1397	0.9313
OW	3	6	32.2606	0.186
OX	0	0	1.3328	0
OY	0	1	2.6961	0.3709
OZ	17	0	0.4972	0
PC	5	3	5.655	0.5305
PC	6	4	12.6711	0.3157
PD	5	0	0.2089	0
PD	6	1	11.4547	0.0873
PD	7	0	10.5294	0
PD	10	0	0.3383	0
PD	11	0	3.5814	0
PD	12	0	6.13	0
PD	13	0	0.3342	0
PE	0	1	0.3331	3.0021
PF	4	1	0.1667	5.9988
PF	5	4	6.0303	0.6633
PF	6	9	20.7617	0.4335
PF	7	5	45.6031	0.1096
PF	8	2	29.7636	0.0672
PF	9	9	45.9767	0.1958
PF	10	2	25.3542	0.0789
PF	11	1	19.9153	0.0502
PF	12	1	29.7808	0.0336
PF	13	2	29.7992	0.0671
PF	14	0	8.4747	0
PF	15	0	1.6694	0
PH	8	0	0.1708	0
PH	9	0	4.4917	0
PH	10	1	10.8567	0.0921
PH	11	0	1.1706	0
PH	13	1	11.3275	0.0883
PH	14	0	23.0553	0
PH	15	0	7.6703	0
PH	16	0	4.1753	0
PH	17	0	1.6739	0
PH	18	0	0.3328	0
PH	19	0	0.6703	0
PH	20	0	2.5908	0
PH	21	0	12.1842	0
PH	22	0	0.6656	0
PJ	5	0	3.3364	0
PJ	6	0	3.5025	0
PJ	7	0	10.6881	0
PJ	8	0	7.0372	0
PJ	9	0	3.9153	0
PJ	10	0	7.7567	0
PJ	11	0	0.6706	0
PL	4	0	0.1678	0
PL	8	0	3.7086	0
PL	9	0	10.6264	0
PL	10	0	4.1703	0
PL	11	0	0.5	0
PL	15	0	0.2497	0
PO	17	0	0.59	0
PO	18	0	4.4958	0
PO	19	0	0.3297	0
PP	26	0	0.3303	0
PP	27	0	14.0394	0
PP	28	0	2.9303	0
PP	29	0	6.0983	0
PP	30	0	2.3381	0
PP	31	0	3.4875	0
PT	0	0	0.3214	0
PU	11	0	3.3344	0
PU	12	0	14.6586	0
PV	0	2	8.2533	0.2423
PW	9	0	4.995	0
PW	10	0	2.3086	0
PW	11	0	8.0547	0
PW	12	0	20.1497	0
PW	13	3	28.5308	0.1051
PW	14	0	32.4158	0
PW	15	0	41.4044	0
PW	16	1	26.6733	0.0375
PW	17	0	11.2194	0
PW	18	0	23.835	0
PW	19	0	15.3225	0
PW	20	0	9.7136	0
PW	21	0	7.355	0
PW	22	0	2.0014	0
PX	5	0	4.3386	0
PY	6	0	6.8736	0
PY	7	3	32.3744	0.0927
PY	8	1	9.1875	0.1088
PY	9	0	1.5008	0
PZ	0	3	1.1672	2.5703
QA	5	0	0.1675	0
QC	0	0	0.3739	0
QC	1	0	1.0469	0
QC	2	0	0.335	0
QD	0	8	5.595	1.4298
QF	1	3	2.3022	1.3031
QF	2	0	1.3281	0
QH	3	0	0.1664	0
QH	6	0	1.0797	0
QH	7	4	6.2503	0.64
QH	8	0	0.5475	0
QI	0	4	2.0439	1.957
QJ	7	0	4.8525	0
QJ	8	0	0.8708	0
QJ	9	0	6.3364	0
QJ	10	0	8.4944	0
QJ	11	0	12.3478	0
QJ	12	1	6.0078	0.1665
QJ	13	2	17.2136	0.1162
QJ	14	0	5.9725	0
QJ	15	0	20.9889	0
QJ	16	1	14.7258	0.0679
QJ	17	0	6.4261	0
QJ	18	0	4.0625	0
QJ	19	0	14.6353	0
QL	0	3	1.6475	1.8209
QN	0	7	6.5878	1.0626
QO	0	0	3.1472	0
QS	0	2	3.7008	0.5404
QU	8	0	0.3322	0
QU	9	0	6.6758	0
QU	10	0	4.6278	0
QU	11	0	0.8303	0
QW	3	0	0.1661	0
QY	6	0	3.4697	0
QY	7	0	3.7058	0
QY	8	0	1.7056	0
QY	10	0	2.8611	0
QY	11	0	2.8442	0
QY	12	0	0.5044	0
RB	7	0	3.3331	0
RB	8	2	4.3406	0.4608
RB	9	0	0.1656	0
RD	0	0	0.0842	0
RE	4	5	4.68	1.0684
RE	5	1	2.5014	0.3998
RE	6	0	0.3342	0
RE	7	0	0.3367	0
RF	22	0	4.6522	0
RF	23	0	7.7308	0
RF	24	0	6.1933	0
RF	25	0	11.0775	0
RF	26	0	1.1708	0
RF	28	0	0.2503	0
RF	29	0	5.6736	0
RF	30	1	3.5736	0.2798
RF	31	0	9.35	0
RF	32	0	3.8436	0
RG	6	6	12.0519	0.4978
RG	7	0	2.73	0
RH	0	73	56.4356	1.2935
RH	1	54	56.8764	0.9494
RH	2	35	59.24	0.5908
RH	3	4	24.1164	0.1659
RH	4	2	26.6667	0.075
RH	5	5	34.3231	0.1457
RH	6	3	20.6361	0.1454
RH	7	0	4.2989	0
RH	8	1	9.8864	0.1011
RH	9	0	8.6608	0
RH	10	0	2.5028	0
RH	11	0	0.6525	0
RH	12	0	1.4856	0
RH	13	0	6.9725	0
RH	14	0	3.6939	0
RH	15	1	19.115	0.0523
RJ	0	11	5.5022	1.9992
RK	4	0	0.8419	0
RK	5	1	1.3864	0.7213
RK	6	0	0.3347	0
RK	7	0	2.4542	0
RK	8	0	4.0083	0
RK	9	0	10.0547	0
RN	5	1	3.1728	0.3152
RN	6	0	1.2547	0
RN	8	0	0.5053	0
RN	9	0	2.9025	0
RN	10	0	1.3367	0
RN	11	0	0.3336	0
RO	2	0	0.1664	0
RO	5	2	11.3453	0.1763
RO	6	5	23.3567	0.2141
RO	7	1	24.6697	0.0405
RO	8	0	0.6644	0
RO	9	0	1.1664	0
RP	5	2	1.6664	1.2002
RP	6	2	12.92	0.1548
RT	5	3	12.715	0.2359
RT	6	0	6.9228	0
RT	7	0	8.8294	0
RT	8	0	4.5072	0
RT	12	0	5.6111	0
RT	13	0	2.5106	0
RU	0	71	54.1083	1.3122
RU	1	51	47.2606	1.0791
RU	2	41	65.6772	0.6243
RU	3	33	56.9789	0.5792
RU	4	38	51.8436	0.733
RU	5	13	22.2456	0.5844
RU	6	0	0.1667	0
RU	7	0	1.1828	0
RU	9	0	0.1678	0
RU	10	0	0.3306	0
RW	3	2	4.4819	0.4462
RW	4	0	0.6625	0
RX	28	0	8.3661	0
RX	29	2	90.7817	0.022
RX	30	1	18.3861	0.0544
RX	31	2	17.5742	0.1138
RX	32	0	1.1564	0
RY	28	0	0.1653	0
RY	29	0	1.0014	0
RY	32	0	1.5003	0
RY	33	0	5.6583	0
RZ	4	0	0.1656	0
SB	1	0	0.1669	0
SB	6	2	18.0283	0.1109
SB	7	1	6.8114	0.1468
SB	8	1	6.0572	0.1651
SB	9	0	1.5039	0
SB	10	1	3.6619	0.2731
SB	11	1	9.9917	0.1001
SB	12	0	0.5	0
SC	6	3	0.6628	4.5263
SC	7	0	0.6697	0
SC	8	1	0.3314	3.0175
SC	9	0	0.6642	0
SC	11	0	0.3753	0
SC	12	0	12.5133	0
SD	18	0	2.8425	0
SD	19	1	30.6864	0.0326
SD	20	0	6.3136	0
SD	21	2	11.22	0.1783
SD	22	0	1.1219	0
SH	0	0	3.9017	0
SH	1	0	0.1667	0
SH	5	0	3.3739	0
SH	6	0	2.1286	0
SH	7	1	10.6822	0.0936
SH	8	0	2.1503	0
SH	12	0	2.0006	0
SH	13	0	6.1969	0
SI	0	0	0.3742	0
SK	6	6	11.1653	0.5374
SK	7	2	24.2867	0.0823
SK	8	6	26.5317	0.2261
SK	9	0	28.6297	0
SK	10	7	39.0347	0.1793
SK	11	11	138.163	0.0796
SK	12	0	32.0972	0
SM	5	0	0.1661	0
SM	6	2	6.0061	0.333
SM	7	8	19.8628	0.4028
SM	8	6	22.9556	0.2614
SM	9	2	33.26	0.0601
SM	10	0	24.8231	0
SM	11	0	23.3444	0
SM	12	0	9.3519	0
SN	5	0	0.1261	0
SN	6	0	0.1661	0
SN	7	6	17.3853	0.3451
SN	8	2	3.5678	0.5606
SN	9	0	5.1639	0
SN	13	1	4.1678	0.2399
SO	8	1	3.3714	0.2966
SP	0	68	61.7906	1.1005
SP	1	1	2.1786	0.459
SR	0	91	61.3875	1.4824
SR	1	102	52.1297	1.9567
SR	2	54	63.5228	0.8501
SR	3	17	29.0647	0.5849
SR	4	23	27.9578	0.8227
SR	5	13	34.2147	0.38
SR	6	12	65.8867	0.1821
SR	7	5	34.1119	0.1466
SS	1	1	0.5822	1.7176
SS	5	0	0.3336	0
SS	11	0	3.715	0
SS	12	0	3.7639	0
ST	10	0	0.8375	0
ST	11	0	6.16	0
ST	12	0	2.8358	0
SY	0	34	30.1633	1.1272
SY	1	43	68.0219	0.6321
SY	2	20	55.4381	0.3608
SY	3	19	49.0306	0.3875
SY	4	11	21.6186	0.5088
SY	5	1	31.9283	0.0313
SY	6	2	32.4542	0.0616
SY	7	0	17.1572	0
SY	8	0	1.6589	0
SY	9	0	12.3211	0
SY	10	0	4.8644	0
SY	11	0	1.6736	0
SY	12	0	0.5533	0
SY	13	0	0.6689	0
TA	23	0	4.5053	0
TA	24	1	22.3078	0.0448
TA	25	0	6.4181	0
TA	26	2	10.34	0.1934
TA	27	0	1.5386	0
TA	29	0	0.585	0
TA	30	0	4.1414	0
TA	31	1	16.2481	0.0615
TA	32	0	19.8083	0
TA	33	1	4.8425	0.2065
TA	35	0	8.2136	0
TA	36	0	0.1669	0
TB	4	0	0.1706	0
TB	5	0	0.3353	0
TB	6	0	2.4883	0
TB	7	1	7.1964	0.139
TB	8	0	1.0064	0
TD	0	64	65.0803	0.9834
TD	1	62	59.3856	1.044
TD	2	34	70.3733	0.4831
TD	3	9	36.9094	0.2438
TD	4	16	45.6339	0.3506
TD	5	11	53.7025	0.2048
TD	6	4	20.7872	0.1924
TD	7	2	7.4094	0.2699
TD	8	0	10.2597	0
TD	9	0	2.5094	0
TD	10	0	2.2108	0
TD	11	0	0.1667	0
TD	12	0	0.8278	0
TD	13	0	3.1839	0
TD	14	0	4.7872	0
TD	15	0	0.3333	0
TG	8	0	0.1669	0
TG	9	0	0.4983	0
TG	10	0	1.8328	0
TG	11	0	0.3342	0
TH	0	84	57.4636	1.4618
TH	1	45	57.4425	0.7834
TH	2	30	59.3697	0.5053
TH	3	12	22.7772	0.5268
TH	4	10	36.8975	0.271
TH	5	3	52.4397	0.0572
TH	6	1	17.7681	0.0563
TH	7	0	17.9783	0
TH	8	1	12.5331	0.0798
TH	9	0	15.5067	0
TH	10	0	10.2067	0
TH	11	0	13.7072	0
TH	12	0	6.3283	0
TH	13	0	4.2672	0
TH	14	0	7.7103	0
TH	15	0	10.5908	0
TJ	7	0	9.4956	0
TJ	8	0	3.8411	0
TJ	9	0	9.5239	0
TJ	10	0	6.6681	0
TJ	11	1	2.8503	0.3508
TJ	12	0	7.83	0
TJ	13	0	0.3347	0
TK	12	0	14.4506	0
TK	16	0	9.4997	0
TK	17	0	2.8517	0
TK	18	0	25.3389	0
TK	19	0	14.2061	0
TK	20	1	16.25	0.0615
TK	21	0	12.9481	0
TK	22	0	4.4281	0
TK	23	0	1.1567	0
TL	30	0	10.9056	0
TO	10	0	0.3322	0
TO	11	0	9.0644	0
TO	12	0	0.2106	0
TO	13	0	0.4169	0
TP	5	0	0.1664	0
TP	6	1	12.82	0.078
TP	7	7	30.4469	0.2299
TQ	4	0	0.3331	0
TS	4	0	0.1661	0
TS	6	0	5.8656	0
TS	7	0	1.3394	0
TS	8	0	0.3322	0
TU	0	79	50.2308	1.5727
TU	1	54	60.1553	0.8977
TU	2	19	69.9167	0.2718
TU	3	14	63.7892	0.2195
TU	4	12	44.8092	0.2678
TU	5	5	36.1114	0.1385
TU	6	5	30.71	0.1628
TV	3	0	0.1681	0
TW	2	0	0.4989	0
TW	3	4	7.9972	0.5002
TW	4	9	21.3028	0.4225
TW	5	11	23.0022	0.4782
TW	6	6	32.69	0.1835
TW	7	5	32.8017	0.1524
TW	8	2	15.9981	0.125
TW	9	0	6.8314	0
TW	10	1	26.5075	0.0377
TW	11	0	1.3375	0
TW	12	0	3.1722	0
TW	13	0	1.0017	0
TW	14	0	1.8964	0
TW	15	0	7.6656	0
TW	16	0	3.3736	0
TX	9	1	5.6489	0.177
TX	10	0	7.7739	0
TX	11	1	4.8403	0.2066
TX	12	0	0.5072	0
UA	0	5	3.7069	1.3488
UB	3	0	0.1667	0
UC	0	0	0.2069	0
UD	1	1	1.6672	0.5998
UD	2	0	1.3772	0
UD	3	0	0.1686	0
UE	0	0	1.5072	0
UG	0	80	55.6531	1.4375
UG	1	53	76.7717	0.6904
UG	2	76	54.9806	1.3823
UG	3	42	53.0808	0.7912
UI	4	0	0.3214	0
UK	2	0	0.2472	0
UK	4	1	1.8306	0.5463
UK	5	1	7.4883	0.1335
UK	6	3	26.5472	0.113
UK	7	0	13.6653	0
UK	8	0	16.3011	0
UK	9	0	9.9844	0
UK	10	0	6.0681	0
UK	11	0	1.4983	0
UK	12	0	4.4192	0
UK	13	0	2.3328	0
UL	0	0	0.3317	0
UO	0	2	2.0397	0.9805
UQ	0	1	0.8392	1.1916
UR	5	0	0.3319	0
UR	6	0	2.3192	0
UR	7	0	0.1686	0
UU	10	0	0.6703	0
UU	11	0	4.8469	0
UU	12	0	0.3325	0
UU	15	0	3.1181	0
UV	0	9	3.3697	2.6709
UW	0	0	0.4975	0
UX	0	3	3.3447	0.8969
UY	0	1	3.7136	0.2693
UZ	1	19	41.3503	0.4595
UZ	2	11	42.3339	0.2598
VA	2	0	0.1683	0
VA	6	0	2.9231	0
VC	0	0	1.0003	0
VD	0	153	67.4106	2.2697
VD	1	65	59.2303	1.0974
VD	2	27	30.5903	0.8826
VD	3	11	31.0081	0.3547
VD	4	10	37.3369	0.2678
VD	5	11	24.9958	0.4401
VD	6	0	16.9733	0
VD	7	0	9.9153	0
VD	8	0	16.0258	0
VD	9	0	13.8586	0
VD	10	0	10.6214	0
VD	11	0	4.0033	0
VH	1	2	5.9217	0.3377
VH	2	0	0.1664	0
VK	0	7	14.4281	0.4852
VM	6	0	0.1664	0
VM	7	0	0.9969	0
VM	8	4	11.3339	0.3529
VM	9	0	3.6942	0
VN	1	1	1.3322	0.7506
VO	0	0	1.0047	0
VP	0	0	0.3333	0
VR	4	4	8.8611	0.4514
VR	5	1	6.205	0.1612
VR	6	1	8.3933	0.1191
VR	7	2	5.21	0.3839
VR	8	0	0.1669	0
VR	9	0	1.6594	0
VR	10	0	1.55	0
VU	0	16	19.4786	0.8214
VU	1	59	68.3406	0.8633
VU	2	47	79.1336	0.5939
VU	3	31	72.3678	0.4284
VU	4	14	59.4969	0.2353
VU	5	6	34.605	0.1734
VU	6	3	32.7983	0.0915
VU	7	2	45.5764	0.0439
VU	8	3	18.2031	0.1648
VU	9	1	12.3792	0.0808
VU	10	1	5.8425	0.1712
VU	11	0	15.3719	0
VV	14	2	20.0758	0.0996
VV	15	0	19.245	0
VV	16	0	0.1667	0
VV	19	0	1.1686	0
VV	20	0	7.3739	0
VV	21	0	10.6836	0
VV	22	0	9.5556	0
VV	23	1	8.8314	0.1132
VV	24	0	12.8594	0
WD	9	0	1.0472	0
WD	10	2	19.06	0.1049
WD	11	0	4.5006	0
WD	12	1	2.6728	0.3741
WD	13	0	3.4217	0
WD	14	0	0.3333	0
WH	0	24	9.4122	2.5499
WH	1	8	11.3033	0.7078
WH	2	1	4.5322	0.2206
WI	0	28	21.7442	1.2877
WI	1	35	60.1986	0.5814
WI	2	19	51.7322	0.3673
WI	3	25	40.6628	0.6148
WM	0	75	57.0831	1.3139
WM	1	74	63.5967	1.1636
WM	2	42	51.3539	0.8179
WM	3	41	67.8728	0.6041
WM	4	18	25.6714	0.7012
WM	5	0	2.6739	0
WM	6	0	0.1611	0
WM	7	0	0.1619	0
WP	1	5	6.3392	0.7887
WP	2	0	0.8428	0
WQ	0	0	0.1678	0
WS	3	8	8.2372	0.9712
WS	4	0	1.1669	0
WS	5	3	1.4858	2.0191
WS	6	0	2.1872	0
WS	7	0	0.3267	0
WS	9	0	6.7542	0
WS	10	0	1.3356	0
WT	0	29	31.295	0.9267
WU	0	0	0.1669	0
WV	1	0	0.1664	0
WV	2	0	0.1672	0
WW	13	0	0.8756	0
WW	14	0	4.885	0
WW	15	0	0.1667	0
WW	18	0	6.39	0
WW	19	0	2.8758	0
WW	20	1	10.6931	0.0935
WW	21	0	1.4139	0
WX	0	0	0.5006	0
WX	1	4	5.2489	0.7621
WX	2	0	0.5431	0
WY	16	0	0.8572	0
WZ	1	8	5.9258	1.35
WZ	2	1	0.9978	1.0022
YA	0	8	6.1789	1.2947
YA	1	73	59.6372	1.2241
YA	2	46	61.8189	0.7441
YA	3	35	91.25	0.3836
YA	4	29	59.4131	0.4881
YA	5	12	39.0444	0.3073
YA	6	1	32.1097	0.0311
YA	7	9	33.8964	0.2655
YA	8	3	35.3675	0.0848
YA	9	2	30.1931	0.0662
YA	10	0	6.9275	0
YA	11	0	4.1692	0
YB	3	1	4.8211	0.2074
YB	4	1	4.3039	0.2323
YB	5	4	9.1719	0.4361
YB	6	0	0.5031	0
YB	7	2	10.0956	0.1981
YB	8	0	2.8244	0
YC	5	5	11.3464	0.4407
YC	6	1	15.6217	0.064
YC	7	1	15.1703	0.0659
YC	8	6	16.0358	0.3742
YC	9	0	3.0911	0
YC	10	4	16.3397	0.2448
YC	11	0	5.5114	0
YC	12	0	3.4628	0
YC	13	0	6.0183	0
YC	14	0	0.1686	0
YH	2	0	0.1631	0
YH	5	6	9.8253	0.6107
YH	6	1	6.7514	0.1481
YI	0	0	0.1758	0
YJ	4	0	0.82	0
YJ	5	0	1.3075	0
YJ	6	0	0.1664	0
YJ	7	0	1.5075	0
YJ	8	1	4.8425	0.2065
YK	0	0	1.5447	0
YN	7	0	0.1667	0
YN	8	1	3.9172	0.2553
YN	9	0	3.5475	0
YN	10	0	0.5025	0
YP	0	4	3.0236	1.3229
YP	1	0	0.5056	0
YQ	0	0	1.8278	0
YX	0	2	3.7644	0.5313
YY	5	0	1.1669	0
YY	6	0	1.0425	0

## Sheet: code
Code for creating model and plots of changes in peering rates by age, using Stata 13.1
.meglm number yearage, exp(focalhours) || focal:, family(nb) link(log)
.margins, at(yearage=(0/38)) predict(fixedonly nooffset)
.marginsplot, recastci(rarea)
